# Supplementary material for: Effect of different spinal segment injuries on postoperative recovery of patients with thoracolumbar fractures and analysis of risk factors
Source: Research Square preprint supplement (doi:10.21203/rs.3.rs-6975371/v1), 2025-07-23
Supplement: Supplementary file 1 [file 02c1b66d84a0887666ad4aa8.docx]

**Supplementary table 1 The score meaning of ODI indicators**

| **Items** | **scores** | **meaning** |
| --- | --- | --- |
| ODI-Pain | 0 | None |
| 1 | Mild |
| 2 | Moderate |
| 3 | Severe |
| ODI-Personal life | 0 | Normal movement, and movement without pain |
| 1 | Normal movement, but with pain |
| 2 | Pain affects personal life, and movement is slow and careful |
| 3 | Needs some help, but can do most of the personal cooking |
| ODI-Lifting | 0 | Lifting heavy objects does not increase pain |
| 1 | Able to lift heavy objects, but with some increased pain |
| 2 | Unable to lift heavy objects from the floor due to pain, but can lift heavy objects placed on the table if the position is suitable |
| 3 | Unable to lift heavy objects from the ground due to pain, but lighter items can be retrieved if the position is suitable |
| ODI-Walking | 0 | Pain does not affect walking |
| 1 | Walk no more than 4 km due to pain |
| 2 | Walk no more than 2 km due to pain |
| 3 | Can only walk with the help of crutches or armpits |
| ODI-Sitting | 0 | Can sit in any chair, time is unlimited |
| 1 | To be able to sit in a suitable chair with unlimited time |
| 2 | Can't sit for more than one hour due to pain |
| 3 | Can't sit for more than half an hour due to pain |
| ODI-Standing | 0 | Can stand for any length of time without increasing pain |
| 1 | Can stand for any length of time, but can increase pain |
| 2 | Unable to stand for more than half an hour due to pain |
| 3 | Stand for no more than 10 minutes due to pain |
| ODI-Sleeping | 0 | Sleep is never disturbed by pain |
| 1 | Sleep is occasionally disturbed by pain |
| 2 | Sleep less than 6 hours a day due to pain |
| 3 | Sleep less than 4 hours a day due to pain |
| ODI-Sexual life, | 0 | Sex is completely normal and pain does not increase |
| 1 | Sex is completely normal, but pain can increase |
| 2 | Sex is generally normal, but activity can cause severe pain |
| 3 | Pain can seriously affect sex life |
| ODI-Social life | 0 | Social life is completely normal and does not increase pain |
| 1 | Social life is normal, but pain can increase |
| 2 | Pain has little effect on social life, but can limit major physical activity |
| ODI-Travlel | 0 | The ability to travel freely and without pain |
| 1 | The ability to travel freely and with pain |
| 2 | Due to pain, travel must not exceed 1 hour |
| 3 | The journey could not take more than half an hour due to the pain |

Abbreviation: ODI = Oswestry dysfunction index; km = kilometer(s).

**Supplementary table 2 The score meaning of JOA indicators**

| **Items** | **scores** | **meaning** |
| --- | --- | --- |
| JOA-patient with lower back/legs pain, | 1 | Frequent mild pain or occasional severe pain |
| 2 | Occasional minor pain |
| 3 | Normal |
| JOA-gait of patients | 2 | Even if the muscles are weak, they can walk more than 500 meters |
| 3 | Normal |
| JOA-bladder function of patients | 0 | Normal |
| -3 | Mild limited |

Abbreviations: JOA, Japanese orthopedics Association score

**Supplementary table 3 Information of postoperative recovery**

| **Items** |  | **T11-T12 group (n=37)** | **T12-L1**  **group (n=169)** | **L1-L2**  **group (n=430)** | ***p* value** |
| --- | --- | --- | --- | --- | --- |
| ODI-Pain intensity, n (%) |  |  |  |  |  |
| 0 | 5 (13.5%) | 17 (10.1%) | 68 (15.8%) | 0.144 |
| 1 | 24 (64.9%) | 128 (75.7%) | 310 (72.1%) |  |
| 2 | 8 (21.6%) | 24 (14.2%) | 51 (11.9%) |  |
| 3 | 0 (0.0%) | 0 (0.0%) | 1 (0.2%) |  |
| ODI-Personal life, n (%) |  |  |  |  |  |
| 0 | 29 (78.4%) | 77 (45.6%) | 234 (54.4%） | 0.001* |
| 1 | 7 (18.9%) | 73 (43.2%） | 152 (35.3%） |  |
| 2 | 1 (2.7%) | 19 (11.2%） | 42 (9.8%) |  |
| 3 | 0 (0.0%) | 0 (0.0%) | 2 (0.5%) |  |
| ODI-Lifting, n (%) |  |  |  |  |  |
| 0 | 1 (2.7%) | 14 (8.3%) | 33 (7.7%) | 0.062 |
| 1 | 23 (62.2%) | 117 (69.2%） | 316 (73.5%) |  |
| 2 | 13 (35.1%) | 33 (19.5%) | 72 (16.7%) |  |
| 3 | 0 (0.0%) | 5 (3.0%） | 9 (2.1%) |  |
| ODI-Walking, n (%) |  |  |  |  |  |
| 0 | 4 (10.8%) | 20 (11.8%） | 53 (12.3%) | 0.823 |
| 1 | 22 (59.5%) | 101 (59.8%) | 264 (61.4%) |  |
| 2 | 11 (29.7%) | 48 (28.4%) | 112 (26.0%) |  |
| 3 | 0 (0.0%) | 0 (0.0%) | 1 (0.2%) |  |
| ODI-Sitting, n (%) |  |  |  |  |  |
| 0 | 2 (5.4%) | 10 (5.9%) | 36 (8.4%) | 0.654 |
| 1 | 24 (64.9%) | 119 (70.4%) | 291 (67.7%) |  |
| 2 | 11 (29.7%) | 36 (21.3%) | 96 (22.3%） |  |
| 3 | 0 (0.0%) | 4 (2.4%) | 7 (1.6%） |  |
| ODI-Standing, n (%) |  |  |  |  |  |
| 0 | 6 (16.2%) | 13 (7.7%) | 51 (11.9%) | 0.344 |
| 1 | 18 (48.6%) | 131 (77.5%) | 302 (70.2%) |  |
| 2 | 13 (35.1%) | 24 (14.2%) | 74 (17.2%) |  |
| 3 | 0 (0.0%) | 1 (0.6%) | 3 (0.7%) |  |
| ODI-Sleeping, n (%) |  |  |  |  |  |
| 0 | 19 (51.4%） | 84 (49.7%) | 190 (44.2%) | 0.230 |
| 1 | 17 (45.9） | 61 (36.1%) | 173 (40.2%) |  |
| 2 | 1 (2.7%) | 23 (13.6%) | 65 (15.1%) |  |
| 3 | 0 (0.0%) | 1 (0.6%) | 2 (0.5%) |  |
| ODI-Sex life, n (%) |  |  |  |  |  |
| 0 | 33 (89.2%) | 146 (86.4%) | 397 (92.3%) | 0.083 |
| 1 | 4 (10.8%) | 22 (13%) | 30 (7%) |  |
| 2 | 0 (0.0%) | 30 (7.0%) | 2 (0.5%) |  |
| 3 | 0 (0.0%) | 56 (8.8%) | 1 (0.2%) |  |
| ODI-Social life, n (%) |  |  |  |  |  |
| 0 | 35 (94.6%) | 161 (95.3%) | 409 (95.1%) | 0.986 |
| 1 | 2 (5.4%) | 7 (4.1%) | 16 (3.7%) |  |
| 2 | 0 (0.0%) | 1 (0.6%) | 25 (3.9%) |  |
| ODI-Traveling, n (%) |  |  |  |  |  |
| 0 | 37 (100.0%) | 163 (96.4%) | 418 (97.2%) | 0.500 |
| 1 | 0 (0.0%) | 5 (3.0） | 8 (1.9%) |  |
| 2 | 0 (0.0%) | 0 (0.0%) | 1 (0.2%) |  |
| 3 | 0 (0.0%) | 1 (0.6） | 3 (0.7） |  |
| ODI index (%), mean ± std |  | 13.89±3.77 | 14.41±4.06 | 13.93±4.54 | 0.463 |

Abbreviations: L, lumbar vertebra; T, thoracic vertebra; %, percentage; n, number; std, standard deviation; JOA, Japanese Orthopaedic Association Scores; ODI, Oswestry Disability Index; m, meters. ODI index = Actual score /50(highest possible score) ×100% [If a question is not answered, the scoring method is: Actual score /45(highest possible score) ×100%. The higher the number, the more severe the dysfunction.]

*The difference was statistically significant, p < 0.05.
